# Supplementary material for: Effect of a Co-Feed Liquid Whey-Integrated Diet on Crossbred Pigs’ Fecal Microbiota
Source: MDPI journal article supplement (doi:10.3390/ani13111750), 2023-05-25
Supplement: s1 [file s1]

**Table S1.** Ingredients and nutritional composition of the diet.

| <b>Ingredients</b>                      | <b>g/kg of dry matter</b> |
|-----------------------------------------|---------------------------|
| Corn                                    | 550                       |
| Broad bean                              | 125                       |
| Peas bean                               | 110                       |
| Sunflower meal (38% crude protein)      | 80                        |
| Wheat middling                          | 70                        |
| Carob                                   | 30                        |
| Sugar cane molasses                     | 13                        |
| <b>Analytical components</b>            | <b>% on a wet basis</b>   |
| Crude protein                           | 17.4                      |
| Crude fat                               | 5.7                       |
| Crude fiber                             | 4.5                       |
| Ash                                     | 5.3                       |
| Calcium                                 | 0.6                       |
| Phosphorus                              | 0.5                       |
| Sodium                                  | 0.2                       |
| Lysine                                  | 1.2                       |
| Methionine + Cystine                    | 0.57                      |
| Tryptophan                              | 0.17                      |
| Threonine                               | 0.62                      |
| <b>Additive components</b>              |                           |
| Vitamin B1                              | 1.0 mg                    |
| Vitamin B2                              | 3.0 mg                    |
| Vitamin B6                              | 1.5 mg                    |
| Vitamin B12                             | 0.015 mg                  |
| Vitamin D3                              | (1.000 UI)                |
| Vitamin E                               | 20 mg                     |
| Vitamin K3                              | 1.0 mg                    |
| Niacin                                  | 15.0 mg                   |
| Calcium-D                               | 10.3 mg                   |
| Choline                                 | 200 mg                    |
| Cu                                      | 14.0 mg                   |
| Fe                                      | 89.8 mg                   |
| I                                       | 0.50 mg                   |
| Mn                                      | 39.9 mg                   |
| Se                                      | 0.15 mg                   |
| Zn                                      | 99.6 mg                   |
| Biotin                                  | 0.10 mg                   |
| <b>Liquid whey chemical composition</b> |                           |
| Fat                                     | 1.3 %                     |
| Protein                                 | 2.7 %                     |
| Lactose                                 | 4.5 %                     |
| Solids non-fat                          | 7.5 %                     |
| Ca                                      | 47 mg/L                   |
| Mg                                      | 9 mg/L                    |
| Cl                                      | 38 mg/L                   |
| K                                       | 192 mg/L                  |
| Na                                      | 92 mg/L                   |
| NaCl                                    | 60 mg/L                   |
| pH                                      | 4.9                       |
| Density                                 | 27.85                     |

Data reported were provided by the commercial farm.
