# Supplementary material for: Effect of a Co-Feed Liquid Whey-Integrated Diet on Crossbred Pigs’ Fecal Microbiota
Source: MDPI journal article supplement (doi:10.3390/ani13111750), 2023-05-25
Supplement: s1 [file s1]

**Table S2.** Differential abundance analysis reporting the significant variation at genus level.

| Genus                        | Log2 Fold Change* | p-value                  | adjusted p-value         |
|------------------------------|-------------------|--------------------------|--------------------------|
| <i>Bifidobacterium</i>       | 2,7558            | 3,97 x 10 <sup>-15</sup> | 7,93 x 10 <sup>-13</sup> |
| <i>Parasutterella</i>        | 3,0901            | 3,12 x 10 <sup>-13</sup> | 3,12 x 10 <sup>-11</sup> |
| <i>Mogibacterium</i>         | -2,8128           | 3,07 x 10 <sup>-11</sup> | 2,05 x 10 <sup>-09</sup> |
| <i>Oxalobacter</i>           | 5,8482            | 1,28 x 10 <sup>-07</sup> | 6,39 x 10 <sup>-06</sup> |
| <i>Faecalibacterium</i>      | -1,7174           | 2,49 x 10 <sup>-07</sup> | 9,81 x 10 <sup>-06</sup> |
| <i>Lactobacillus</i>         | 1,1807            | 2,94 x 10 <sup>-07</sup> | 9,81 x 10 <sup>-06</sup> |
| <i>Campylobacter</i>         | 1,372             | 1,22 x 10 <sup>-06</sup> | 3,49 x 10 <sup>-05</sup> |
| <i>Collinsella</i>           | -4,6674           | 5,23 x 10 <sup>-06</sup> | 1.19 x 10 <sup>-04</sup> |
| <i>Oribacterium</i>          | -2,1668           | 5,40 x 10 <sup>-06</sup> | 1.19 x 10 <sup>-04</sup> |
| <i>Lachnobacterium</i>       | -1,6558           | 1,57 x 10 <sup>-05</sup> | 3.13 x 10 <sup>-04</sup> |
| <i>Fournierella</i>          | -1,9893           | 1,73 x 10 <sup>-05</sup> | 3.14 x 10 <sup>-04</sup> |
| <i>Mediterranea</i>          | -3,8855           | 1,92 x 10 <sup>-05</sup> | 3.19 x 10 <sup>-04</sup> |
| <i>Gemmiger</i>              | -1,4709           | 3,03 x 10 <sup>-05</sup> | 4.66 x 10 <sup>-04</sup> |
| <i>Cellulosilyticum</i>      | 2,7283            | 5,98 x 10 <sup>-05</sup> | 8.54 x 10 <sup>-04</sup> |
| <i>Coproccoccus</i>          | -1,9272           | 6,70 x 10 <sup>-05</sup> | 8.93 x 10 <sup>-04</sup> |
| <i>Sutterella</i>            | -1,3979           | 1.25 x 10 <sup>-04</sup> | 1.54 x 10 <sup>-03</sup> |
| <i>Slackia</i>               | -2,9637           | 1.32 x 10 <sup>-04</sup> | 1.54 x 10 <sup>-03</sup> |
| <i>Alistipes</i>             | 1,0593            | 1.39 x 10 <sup>-04</sup> | 1.54 x 10 <sup>-03</sup> |
| <i>Ruminococcus</i>          | 1,3224            | 3.81 x 10 <sup>-04</sup> | 3.99 x 10 <sup>-03</sup> |
| <i>Lachnoclostridium</i>     | 0,60017           | 3.99 x 10 <sup>-04</sup> | 3.99 x 10 <sup>-03</sup> |
| <i>Butyricicoccus</i>        | -1,1101           | 4.33 x 10 <sup>-04</sup> | 4.12 x 10 <sup>-03</sup> |
| <i>Fibrobacter</i>           | 1,1034            | 9.28 x 10 <sup>-04</sup> | 8.44 x 10 <sup>-03</sup> |
| <i>Petrimonas</i>            | 3,8546            | 9.72 x 10 <sup>-04</sup> | 8.45 x 10 <sup>-03</sup> |
| <i>Ruthenibacterium</i>      | -1,535            | 1.62 x 10 <sup>-03</sup> | 1.34 x 10 <sup>-02</sup> |
| <i>Parabacteroides</i>       | 0,77954           | 1.72 x 10 <sup>-03</sup> | 1.34 x 10 <sup>-02</sup> |
| <i>Solitalea</i>             | 1,5431            | 1.74 x 10 <sup>-03</sup> | 1.34 x 10 <sup>-02</sup> |
| <i>Corynebacterium</i>       | -2,1777           | 1.93 x 10 <sup>-03</sup> | 1.43 x 10 <sup>-02</sup> |
| <i>Lachnospira</i>           | -1,3854           | 2.26 x 10 <sup>-03</sup> | 1.58 x 10 <sup>-02</sup> |
| <i>Ruminiclostridium</i>     | 0,6677            | 2.30 x 10 <sup>-03</sup> | 1.58 x 10 <sup>-02</sup> |
| <i>Phascolarctobacterium</i> | 1,2654            | 3.38 x 10 <sup>-03</sup> | 2.23 x 10 <sup>-02</sup> |
| <i>Anaerotruncus</i>         | 0,84996           | 3.57 x 10 <sup>-03</sup> | 2.23 x 10 <sup>-02</sup> |
| <i>Enterorhabdus</i>         | -1,8791           | 3.58 x 10 <sup>-03</sup> | 2.23 x 10 <sup>-02</sup> |
| <i>Angelakisella</i>         | 0,78807           | 3.72 x 10 <sup>-03</sup> | 2.25 x 10 <sup>-02</sup> |
| <i>Paraeggerthella</i>       | -1,9912           | 3.96 x 10 <sup>-03</sup> | 2.26 x 10 <sup>-02</sup> |
| <i>Oscillospira</i>          | 0,55307           | 3.99 x 10 <sup>-03</sup> | 2.26 x 10 <sup>-02</sup> |
| <i>Peptococcus</i>           | -1,0756           | 4.08 x 10 <sup>-03</sup> | 2.26 x 10 <sup>-02</sup> |
| <i>Dorea</i>                 | -1,1646           | 5.70 x 10 <sup>-03</sup> | 3.08 x 10 <sup>-02</sup> |
| <i>Taibaiella</i>            | 1,1028            | 7.73 x 10 <sup>-03</sup> | 4.02 x 10 <sup>-02</sup> |
| <i>Anaerobium</i>            | 1,579             | 7.84 x 10 <sup>-03</sup> | 4.02 x 10 <sup>-02</sup> |
| <i>Blautia</i>               | -0,79387          | 8.87 x 10 <sup>-03</sup> | 4.36 x 10 <sup>-02</sup> |
| <i>Filobacterium</i>         | 2,8164            | 8.95 x 10 <sup>-03</sup> | 4.36 x 10 <sup>-02</sup> |
| <i>Bacteroides</i>           | 1,0571            | 9.57 x 10 <sup>-03</sup> | 4.54 x 10 <sup>-02</sup> |
| <i>Rubrivirga</i>            | 2,8509            | 9.76 x 10 <sup>-03</sup> | 4.54 x 10 <sup>-02</sup> |

\* changes in genus-level abundance refer to co-feed integration over time (T2 vs T0).
