# Supplementary figures and images for: Effect of a Co-Feed Liquid Whey-Integrated Diet on Crossbred Pigs’ Fecal Microbiota
Source: MDPI journal article supplement (doi:10.3390/ani13111750), 2023-05-25

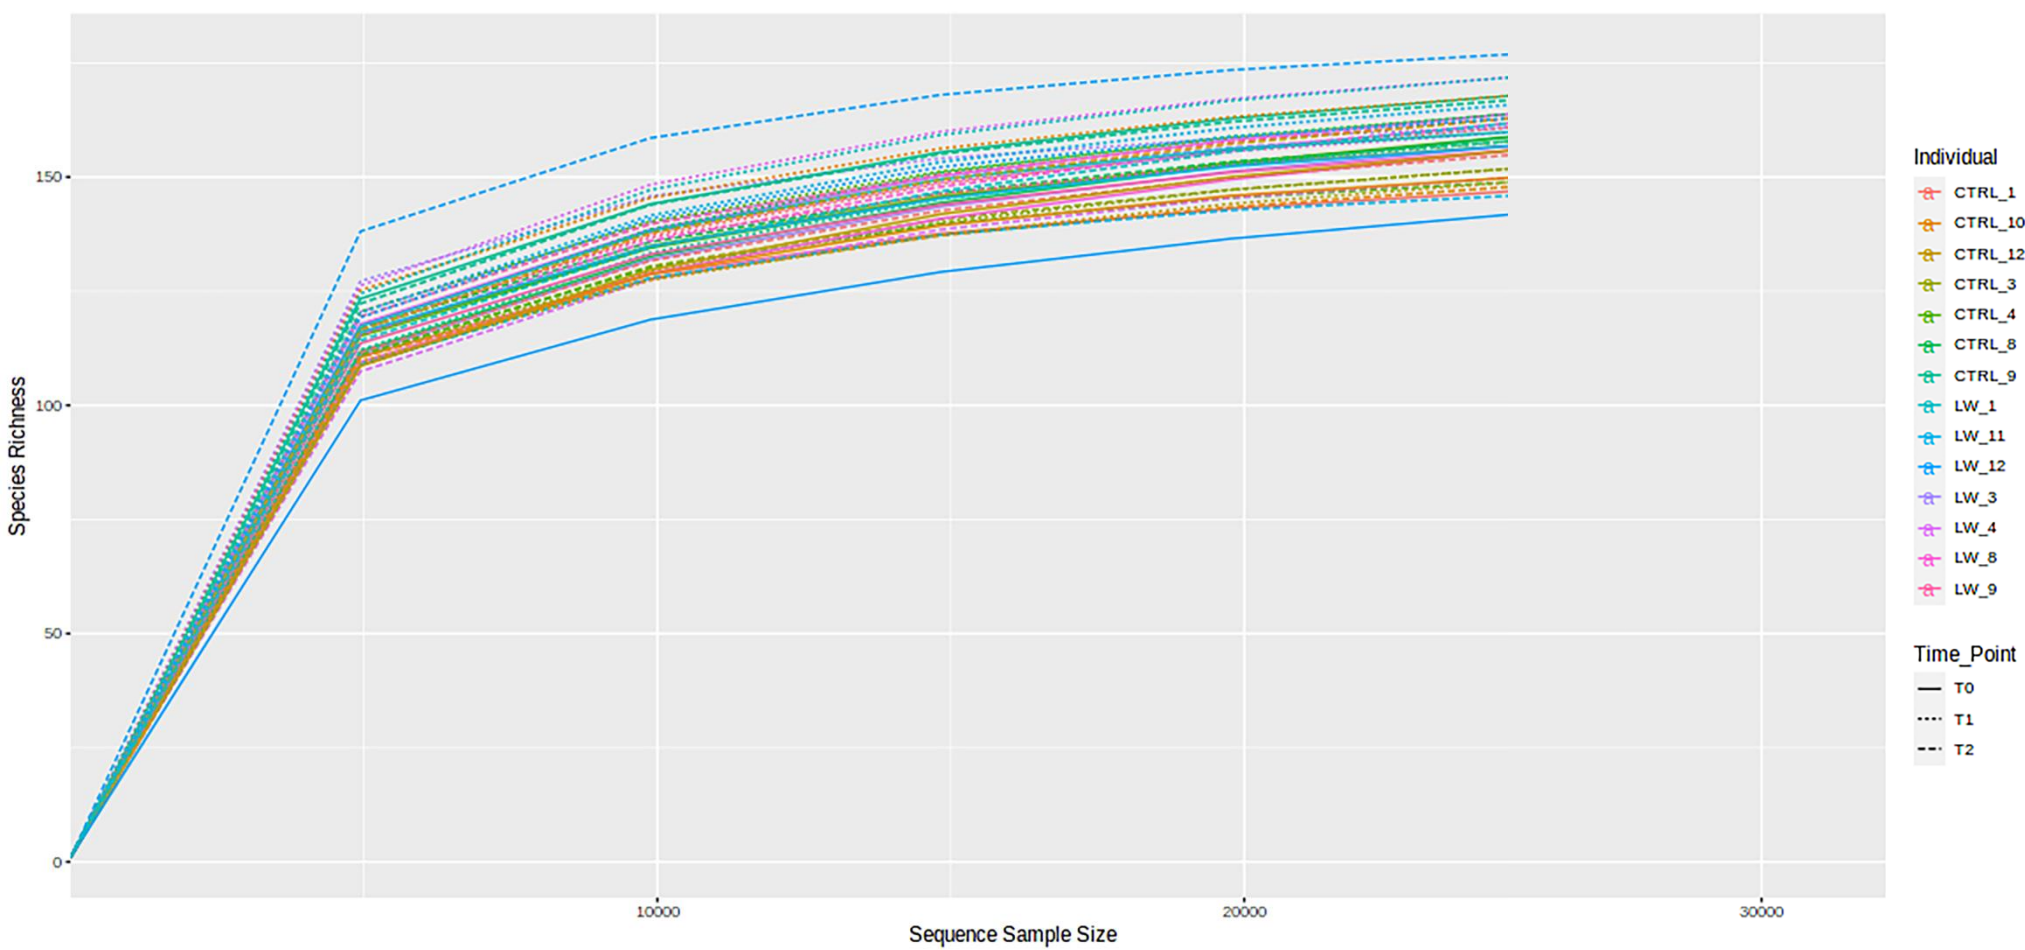

Supplement: s1 [file s1]
